# Supplementary material for: Two-dimensional Mo1−xB2 with ordered metal vacancies obtained for advanced thermoelectric applications based on first-principles calculations
Source: Royal Society of Chemistry journal article supplement (doi:10.1039/d4cp00319e), 2024-01-01
Supplement: d4cp00319e1.pdf [file d4cp00319e1.pdf]

## Supporting Information

### Two-dimensional $\text{Mo}_{1-x}\text{B}_2$ with ordered metal vacancies obtained for advanced thermoelectric applications based on first-principles calculations

Jie Pu<sup>1</sup>, Ziyu Hu<sup>1,\*</sup>, Xiaohong Shao<sup>1,\*</sup>

<sup>1</sup>College of Mathematics and Physics, Beijing University of Chemical Technology, Beijing, 100029, China

\*Correspondence and requests for materials should be addressed to X. H. Shao ([shaoxh@mail.buct.edu.cn](mailto:shaoxh@mail.buct.edu.cn)) and Z. Y. Hu ([huziyu@mail.buct.edu.cn](mailto:huziyu@mail.buct.edu.cn))

**Table S1.** Lattice Constants and bonds length of  $\text{Mo}_{1-x}\text{B}_2$  ( $x=0, 0.05, 0.10, 0.125, 0.15$ ).

|                               | a=b(Å) | c(Å)   | B-B   | Mo-Mo | Mo-B  |
|-------------------------------|--------|--------|-------|-------|-------|
| $\text{MoB}_2$                | 10.271 | 23.720 | 1.708 | 2.986 | 2.221 |
| $\text{Mo}_{0.95}\text{B}_2$  | 10.271 | 23.720 | 1.712 | 2.890 | 2.264 |
| $\text{Mo}_{0.9}\text{B}_2$   | 10.271 | 23.720 | 1.701 | 2.830 | 2.178 |
| $\text{Mo}_{0.875}\text{B}_2$ | 10.271 | 23.720 | 1.717 | 2.786 | 2.222 |
| $\text{Mo}_{0.85}\text{B}_2$  | 10.271 | 23.720 | 1.728 | 2.774 | 2.123 |

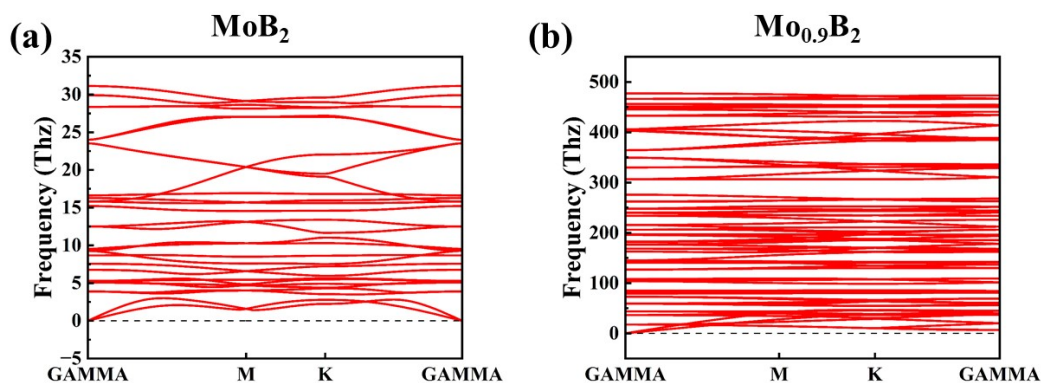

**Figure S1.** Phonon spectra of  $\text{MoB}_2$  (a) and  $\text{Mo}_{0.9}\text{B}_2$  (b).

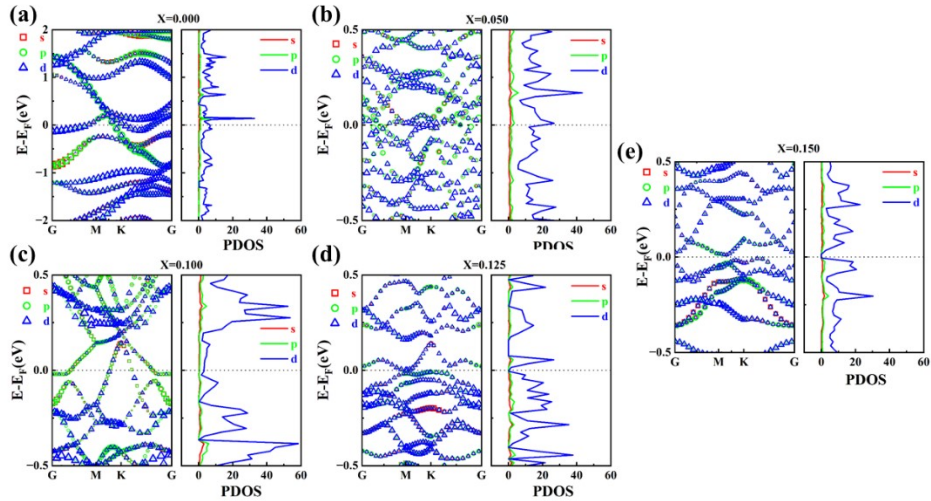

**Figure S2.** The orbital projection energy bands and the density of projected states of Mo in  $\text{Mo}_{1-x}\text{B}_2$ , with (a)  $x = 0.000$ , (b)  $x = 0.050$ , (c)  $x = 0.100$ , (d)  $x = 0.125$ , (e)  $x = 0.150$  calculated by PBE.

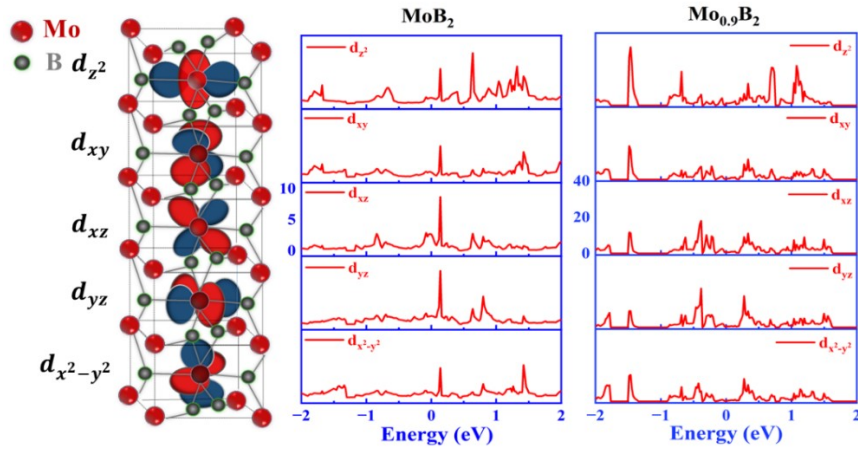

**Figure S3.** Bonding analysis of Mo atoms. Partial orbitals diagram comparisons between  $\text{MoB}_2$  and  $\text{Mo}_{0.9}\text{B}_2$ .

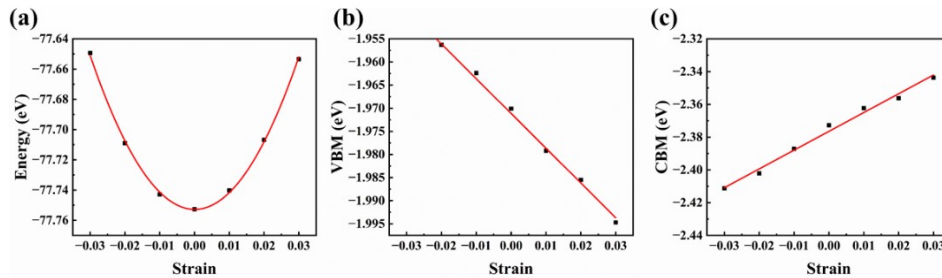

**Figure S4.** (a) The total energy of  $\text{MoB}_2$  is fitted along the a-axis direction, (b) the energy changes of electrons at valence band maximum (VBM), (c) the energy changes of holes at the conduction band minimum (CBM).

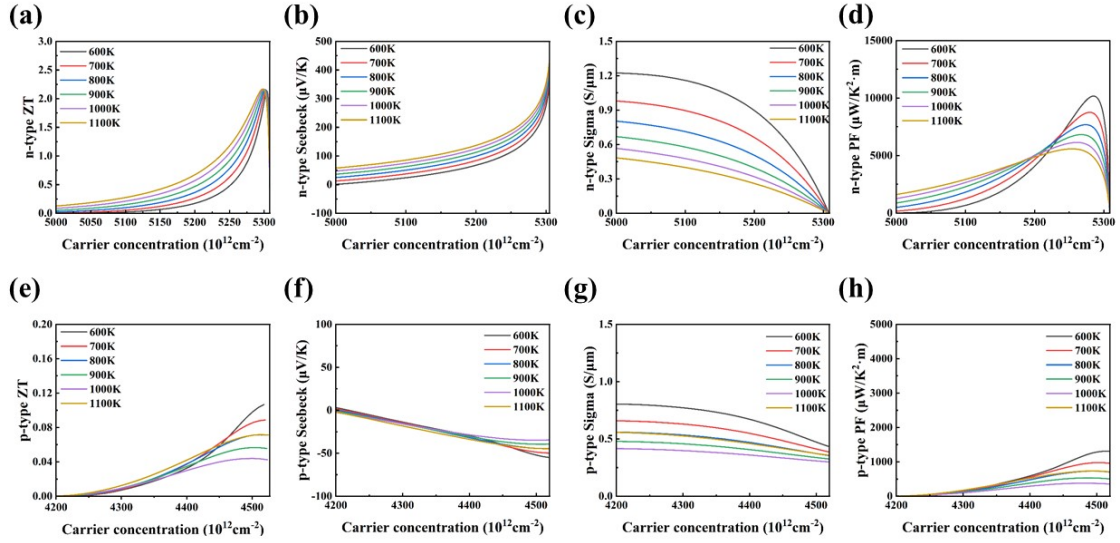

**Figure S5.** Thermoelectric parameters of *n*-type and *p*-type monolayer MoB<sub>2</sub> varied with carrier concentration. (a) *n*-type ZT value, (b) *n*-type Seebeck coefficient, (c) *n*-type conductivity, (d) *n*-type power factor, (e) *p*-type ZT value, (f) *p*-type Seebeck coefficient, (g) *p*-type conductivity, (h) *p*-type power factor.

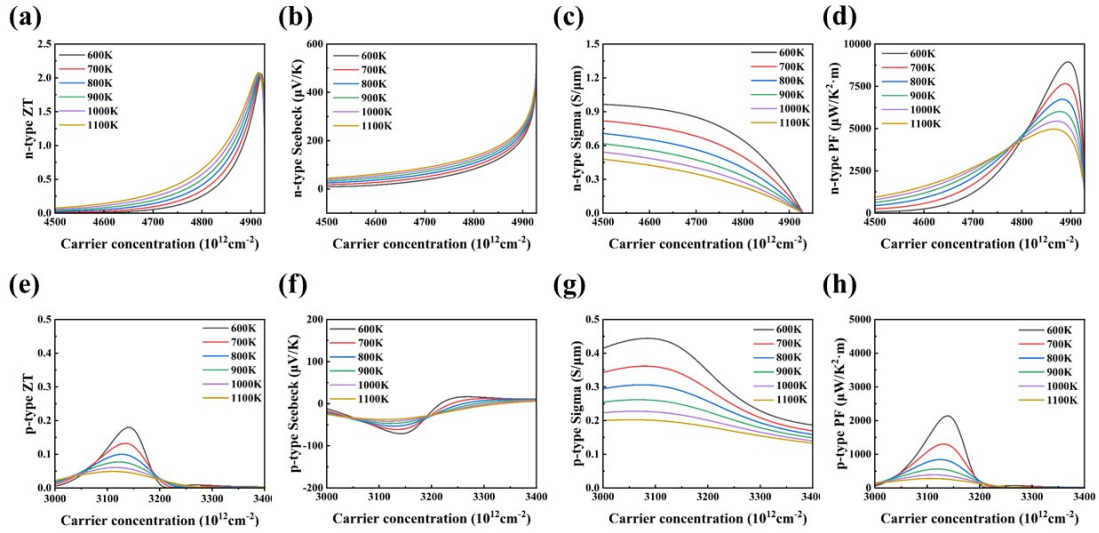

**Figure S6.** Thermoelectric parameters of *n*-type and *p*-type monolayer Mo<sub>0.95</sub>B<sub>2</sub> varied with carrier concentration. (a) *n*-type ZT value, (b) *n*-type Seebeck coefficient, (c) *n*-type conductivity, (d) *n*-type power factor, (e) *p*-type ZT value, (f) *p*-type Seebeck coefficient, (g) *p*-type conductivity, (h) *p*-type power factor.

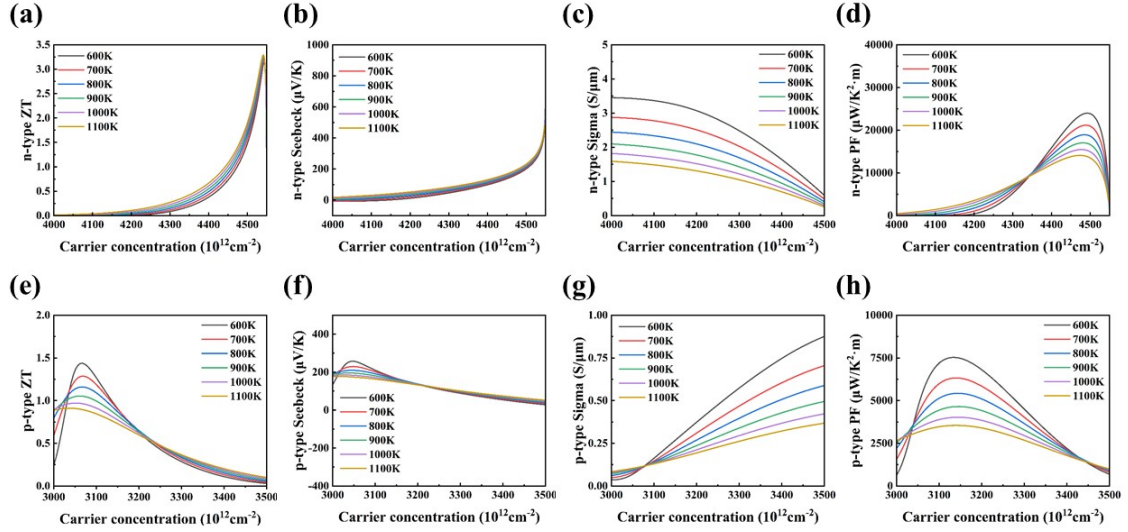

**Figure S7.** Thermoelectric parameters of *n*-type and *p*-type monolayer  $\text{Mo}_{0.9}\text{B}_2$  varied with carrier concentration. (a) *n*-type ZT value, (b) *n*-type Seebeck coefficient, (c) *n*-type conductivity, (d) *n*-type power factor, (e) *p*-type ZT value, (f) *p*-type Seebeck coefficient, (g) *p*-type conductivity, (h) *p*-type power factor.

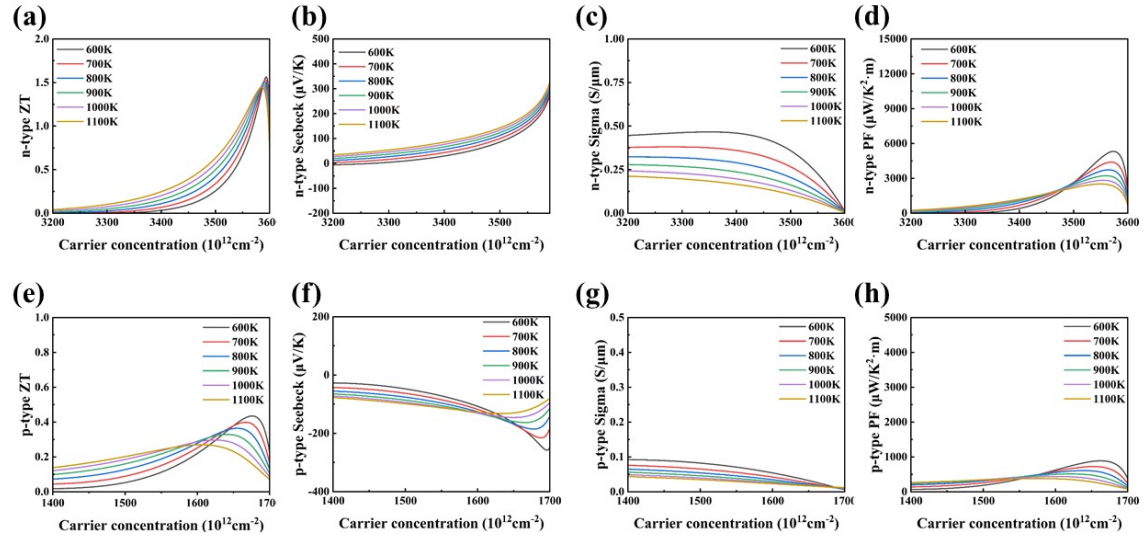

**Figure S8.** Thermoelectric parameters of *n*-type and *p*-type monolayer  $\text{Mo}_{0.875}\text{B}_2$  varied with carrier concentration. (a) *n*-type ZT value, (b) *n*-type Seebeck coefficient, (c) *n*-type conductivity, (d) *n*-type power factor, (e) *p*-type ZT value, (f) *p*-type Seebeck coefficient, (g) *p*-type conductivity, (h) *p*-type power factor.

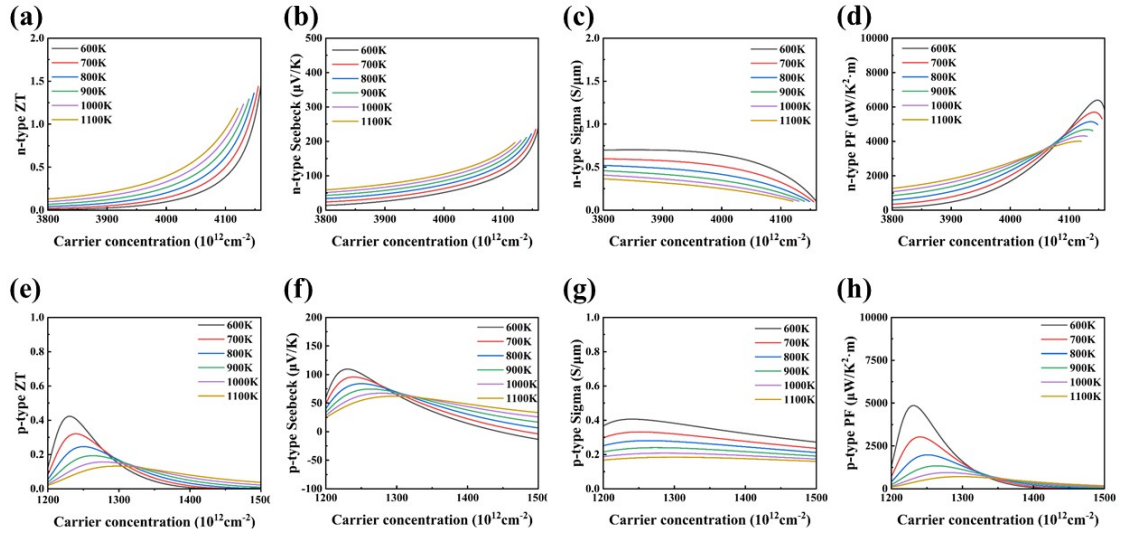

**Figure S9.** Thermoelectric parameters of *n*-type and *p*-type monolayer  $\text{Mo}_{0.85}\text{B}_2$  varied with carrier concentration. (a) *n*-type ZT value, (b) *n*-type Seebeck coefficient, (c) *n*-type conductivity, (d) *n*-type power factor, (e) *p*-type ZT value, (f) *p*-type Seebeck coefficient, (g) *p*-type conductivity, (h) *p*-type power factor.
